# Supplementary material
Source: publisher figshare collection journal article supplement (https://karger.figshare.com/ndownloader/files/37466383)
Supplement: Supplementary file 1 [file 37466383]

Supplementary Table 1: Medication scores modified from Sussman et al. [11]

| Drug /Frequency | Scores |
| --- | --- |
| Antihistamines (fexofenadine 180mg*, rupatadine 10 mg** or cetirizine 10 mg***) / once a day | 2 points |
| Antihistamines / twice a day | 4 points |
| Antihistamines / 3 times a day | 6 points |
| Antihistamines / 4 times a day | 8 points |
| Montelukast**** | 2 points |
| Anti-IgE treatment***** | 10 points |
| Cyclosporine****** | 8 points |

Information about the drugs *Fexadyne® Ali Raif in Basaksehir, Istanbul; Fexofen® Sanovel in Istinye, Istanbul; Allegra® Sanofi in Luleburgaz, Kırklareli

** Rupafin® J. Uriach y Compania and Abdi Ibrahim in Maslak, Sarıyer, Istanbul; Ripatrin® Deva in Kucukcekmece, Istanbul, rupatek® Bilim in Gebze, Kocaeli; Anthix® Santa Farma in Edirnekapı, Istanbul

*** Allerset® Santa Farma in Dilovası, Kocaeli; Cetyrn® Tripharma in Maslak, Sarıyer, Istanbul; Hitrizin® Deva in Kapaklı, Tekirdag; Zyrtec® UCB Pharma in Topkapı, Istanbul

**** Notta® Sanovel in Silivri, Istanbul; Alecast® ILKO in Selcuklu, Konya; Zespira® Bilim in Gebze, Kocaeli; Onceair® Abdi Ibrahim in Esenyurt, Istanbul; N-FESS® Recordati in Kapaklı, Tekirdağ, Luxat® Deva in Cerkezköy, Tekirdag; Singulair® Merck Sharp Dohme in Haarlem Holland; Aırfix® Neutec in Adapazarı, Sakarya; Sinmont® Pharmactive in kapaklı, Tekirdag

***** Xolair® Novartis Pharma in Stein, Switzerland

****** Sandimmun-Neoral® Novartis Pharma in Eberbach, Germany
